# Supplementary material
Source: Research Square preprint supplement (doi:10.21203/rs.3.rs-9658721/v1)
Supplement: Supplementary file 1 [file 1cf28b6f00fa07271d99c5b3.docx]

**Supplementary information**

**Title**: Industrial byproduct corn steep liquor enhanced drought tolerance by preserve membrane lipids and reestablishing redox homeostasis in tea plants (*Camellia sinensis*)

**Running title:** Corn steep liquor alleviated drought stress of tea plants

**Authors:**

Xin Liang1,a, Yanhua Jiang1,b, Peibin Daic, Yike Shaoc, Yang Liua, Yu Duana, Shanshan Wanga, Yufeng Lud, Haiqiang Feng e*, Li Ruana*

**Institutions:**

a Institute of Sericulture and Tea, Zhejiang Academy of Agricultural Sciences, Hangzhou, 310021, China

b Ninghai County Agricultural Industrialization Development Center, Ningbo, 315600, China

c School of Food and Health, Zhejiang Institute of Economics and Trade, Hangzhou, 310018, China

d Ruojun (Hangzhou) Ecological Agriculture Development Co., Ltd, Hangzhou, 311701, China

e Zhejiang Agricultural Technology Extension Center, Hangzhou 310020, China

1: Xin Liang, Yanhua Jiang contributed equally to this work.

* Corresponding author:

Haiqiang Feng*, 13588416332@163.com

Li Ruan*, ruanl@zaas.ac.cn


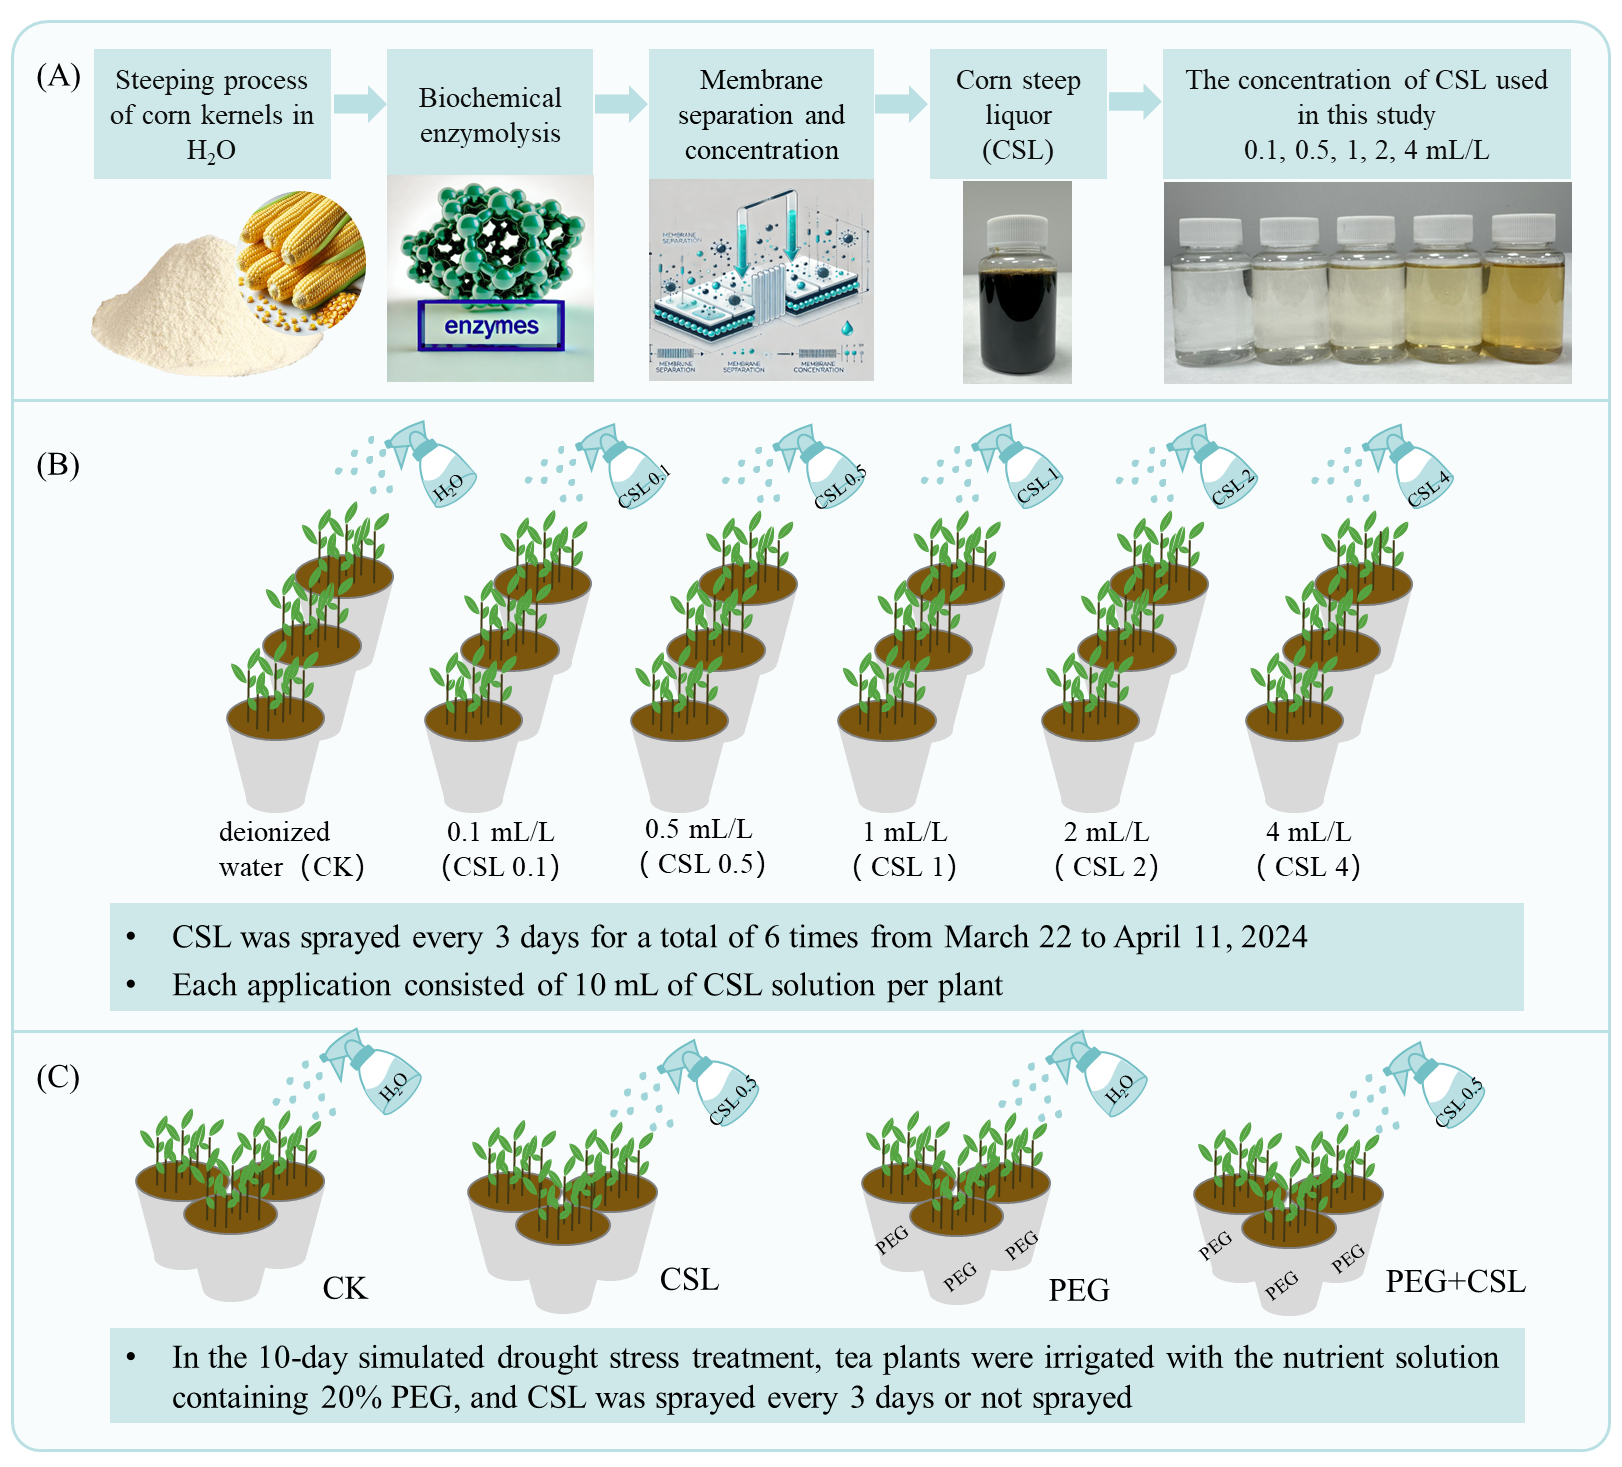


**Figure S1 Schematic diagram of preparation process for CSL (A), treatments and concentrations of CSL in this study (B&C).** CSL is a yellow-brown organic liquid residue obtained from the water used in the wet milling of corn kernels through enzymatic hydrolysis, membrane filtration, and concentration processes (A). Concentration gradient experiment of foliar spraying of CSL (B). Drought stress on tea plants was simulated using polyethylene glycol (PEG) and sprayed with or without CSL (C).

**Figure S2. Effects of CSL on the morphological attributes (A), growth (B, C, D, E, F, G), photosynthetic related parameters (H, I, J, K, L, M).** CK, CSL0.1, CSL0.5, CSL1, CSL2, and CSL4 represent the application concentration of CSL at 0 mL/L, 0.1 mL/L, 0.5 mL/L, 1 mL/L, 2 mL/L, and 4 mL/L, respectively. Fv/Fm: maximum photochemical quantum yield (maximum photosynthetic efficiency) of PSⅡ. ETR: photosynthetic electron transfer efficiency of PSⅡ reaction center. NPQ: non-photochemical quenching coefficient. Different lowercase letters indicate significant differences between treatments (*p*<0.05).

**Table S1. Basic properties of corn steep liquor and content of major natural active components**

| pH | 4.0-5.0 |
| --- | --- |
| Proportion | 1.18 |
| Organic matter | 200 g/L |
| Total nutrients（N+P2O5+K2O） | 80 g/L |
| Amino acid | 70 g/L |
| Small peptide | 18 g/L |
| Organic acid ( C<6) | 280 g/L  (Lactic acid 32.1%, Propionic acid 35.7%, Citric acid 17.9%) |
| Sugar | 30 g/L |

**Table S2. Information on fatty acids detected in tea leaves**

| Chemical formula abbreviation | Full name | Property |
| --- | --- | --- |
| C24:0 | tetracosanoic acid (lignoceric acid) | saturated fatty acid, long-chain fatty acids |
| C23:0 | tricosanoic acid | saturated fatty acid, long-chain fatty acids |
| C22:0 | docosanoic acid (behenic acid) | saturated fatty acid, long-chain fatty acids |
| C22:1 n-9c | cis-13-docosenoic acid (erucic acid) | unsaturated fatty acid, long-chain fatty acids |
| C20:0 | eicosanoic acid (arachidic acid) | saturated fatty acid, long-chain fatty acids |
| C18:3 n-3c | cis-9,12,15-octadecatrienoic acid (alpha-linolenic acid) | unsaturated fatty acid, long-chain fatty acids |
| C18:2 n-6c | cis-9,12-octadecadienoic acid (linoleic acid) | unsaturated fatty acid, long-chain fatty acids |
| C18:2 n-6t | trans-9,12-octadecadienoic acid (linoelaidic acid) | unsaturated fatty acid, long-chain fatty acids |
| C18:0 | octadecanoic acid (stearic acid) | saturated fatty acid, long-chain fatty acids |
| C18:1 n-9c | cis-9-octadecenoic acid (oleic acid) | unsaturated fatty acid, long-chain fatty acids |
| C17:0 | heptadecanoic acid (margaric acid) | saturated fatty acid, long-chain fatty acids |
| C16:1n7c | cis-9-hexadecenoic acid (palmitoleic acid) | unsaturated fatty acid, long-chain fatty acids |
| C16:0 | hexadecanoic acid (palmitic acid) | saturated fatty acid, long-chain fatty acids |
| C15:0 | pentadecanoic acid | saturated fatty acid, long-chain fatty acids |
| C14:0 | tetradecanoic acid (myristic acid) | saturated fatty acid, long-chain fatty acids |
| C12:0 | dodecanoic acid (lauric acid) | saturated fatty acid, medium-chain fatty acids |
| C10:0 | decanoic acid | saturated fatty acid, medium-chain fatty acids |
| C9:0 | nonanoic acid | saturated fatty acid, medium-chain fatty acids |
| C8:0 | octanoic acid | saturated fatty acid, medium-chain fatty acids |
| C6:0 | hexanoic acid | saturated fatty acid, medium-chain fatty acids |
| i-C10:0 | isodecanoic acid | saturated fatty acid, medium-chain fatty acids |
| br-C9:0 | 3,5,5-trimethylhexanoic acid | saturated fatty acid, medium-chain fatty acids |
| i-C5:0 | isovaleric acid | saturated fatty acid, short-chain fatty acids |
| C3:0 | propionic acid | saturated fatty acid, short-chain fatty acids |
| a-C5:0 | 2-methylbutyric acid | saturated fatty acid, short-chain fatty acids |
| C5:0 | valeric acid | saturated fatty acid, short-chain fatty acids |
| C2:0 | acetic acid | saturated fatty acid, short-chain fatty acids |
| C4:0 | butyric acid | saturated fatty acid, short-chain fatty acids |
